# Supplementary material for: Gender Agreement Attraction in Russian: Production and Comprehension Evidence
Source: PubMed Central journal article supplement (PMC5095607; doi:10.3389/fpsyg.2016.01651), 2016-11-04
Supplement: DataSheet1.pdf [file DataSheet1.pdf]

# Supplementary Material:

## Gender agreement attraction in Russian: production and comprehension evidence

Natalia Slioussar\*, Anton Malko

\*Correspondence:  
Natalia Slioussar  
slioussar@gmail.com

### 1 EXPERIMENT 1

Table 1: Experiment 1 stimuli

| Preamble                                                                                                          | Predicate                                                                 |
|-------------------------------------------------------------------------------------------------------------------|---------------------------------------------------------------------------|
| Okno v pole / dvor<br>window <sub>N</sub> to field <sub>N</sub> / yard <sub>M</sub>                               | bylo otkrytym / byl otkrytym<br>was opened <sub>N/M</sub>                 |
| Mesto pod radio / televizor<br>place <sub>N</sub> for radio <sub>N</sub> / TV-set <sub>M</sub>                    | bylo svobodnym / byl svobodnym<br>was not.occupied <sub>N/M</sub>         |
| Vino pod mjaso / syr<br>wine <sub>N</sub> for meat <sub>N</sub> / cheese <sub>M</sub>                             | bylo kislym / byl kislym<br>was sour <sub>N/M</sub>                       |
| Upražnenie na čtenie / sčet<br>exercise <sub>N</sub> in reading <sub>N</sub> / counting <sub>M</sub>              | bylo trudnym / byl trudnym<br>was difficult <sub>N/M</sub>                |
| Vremja na zadanie / otdyx<br>time <sub>N</sub> for task <sub>N</sub> / rest <sub>M</sub>                          | bylo nedostatočnym / byl nedostatočnym<br>was insufficient <sub>N/M</sub> |
| Razrešenie na stroitel'stvo / snos<br>permit <sub>N</sub> for construction <sub>N</sub> / demolition <sub>M</sub> | bylo nezakonnym / byl nezakonnym<br>was illegal <sub>N/M</sub>            |
| Pravo na sčast'e / otdyx<br>right <sub>N</sub> for happiness <sub>N</sub> / rest <sub>M</sub>                     | bylo vseobščim / byl vseobščim<br>was universal <sub>N/M</sub>            |
| Pis'mo pro priklučenie / poxod<br>letter <sub>N</sub> about adventure <sub>N</sub> / camping <sub>M</sub>         | bylo uvlekatel'nym / byl uvlekatel'nym<br>was interesting <sub>N/M</sub>  |
| Ranenie v plečo / život<br>wound <sub>N</sub> in shoulder <sub>N</sub> / belly <sub>M</sub>                       | bylo legkim / byl legkim<br>was light <sub>N/M</sub>                      |
| Pogruženie v more / okean<br>dive <sub>N</sub> in sea <sub>N</sub> / ocean <sub>M</sub>                           | bylo dolgim / byl dolgim<br>was long <sub>N/M</sub>                       |

Table 1: Experiment 1 stimuli

| Preamble                                                                                                         | Predicate                                                                   |
|------------------------------------------------------------------------------------------------------------------|-----------------------------------------------------------------------------|
| Vozdejstvie na soznanie / rozum<br>impact <sub>N</sub> on consciousness <sub>N</sub> / mind <sub>M</sub>         | bylo nezametnym / byl nezametnym<br>was imperceptible <sub>N/M</sub>        |
| Zajavlenie na uvol'nenie / otpusk<br>application <sub>N</sub> for job.quit <sub>N</sub> / leave <sub>M</sub>     | bylo formal'nym / byl formal'nym<br>was formal <sub>N/M</sub>               |
| Stakan pod čaj / moloko<br>cup <sub>M</sub> for tea <sub>M</sub> / milk <sub>N</sub>                             | byl stekljannym / bylo stekljannym<br>was made.of.glass <sub>M/N</sub>      |
| Vyxod v les / pole<br>exit <sub>M</sub> to forest <sub>M</sub> / field <sub>N</sub>                              | byl zabrošennym / bylo zabrošennym<br>was abandoned <sub>M/N</sub>          |
| Vzgljad na ekran / izobraženie<br>look <sub>M</sub> at screen <sub>M</sub> / image <sub>N</sub>                  | byl beglym / bylo beglym<br>was cursory <sub>M/N</sub>                      |
| Otvēt na vopros / vozraženie<br>answer <sub>M</sub> to question <sub>M</sub> / objection <sub>N</sub>            | byl bystrym / bylo bystrym<br>was quick <sub>M/N</sub>                      |
| Vid na zaliv / more<br>view <sub>M</sub> of gulf <sub>M</sub> / sea <sub>N</sub>                                 | byl vpečatljajuščim / bylo vpečatljajuščim<br>was impressive <sub>M/N</sub> |
| Pryžok čerez zabor / ograždenie<br>jump <sub>M</sub> over fence <sub>M</sub> / hedge <sub>N</sub>                | byl neudačnym / bylo neudačnym<br>was not.successful <sub>M/N</sub>         |
| Udar o kosjak / derevo<br>hit <sub>M</sub> against doorjamb <sub>M</sub> / tree <sub>N</sub>                     | byl sil'nym / bylo sil'nym<br>was strong <sub>M/N</sub>                     |
| Test na intellekt / vnimanie<br>test <sub>M</sub> of intelligence <sub>M</sub> / attention <sub>N</sub>          | byl složnym / bylo složnym<br>was difficult <sub>M/N</sub>                  |
| Bilet na spektakl' / predstavlenie<br>ticket <sub>M</sub> for play <sub>M</sub> / show <sub>N</sub>              | byl deševym / bylo deševym<br>was cheap <sub>M/N</sub>                      |
| Bočonok pod rom / vino<br>barrel <sub>M</sub> for rum <sub>M</sub> / wine <sub>N</sub>                           | byl polnym / bylo polnym<br>was full <sub>M/N</sub>                         |
| Talon na osmotr / obsledovanie<br>ticket <sub>M</sub> for examination <sub>M</sub> / examination <sub>N</sub>    | byl mjatym / bylo mjatym<br>was crumpled <sub>M/N</sub>                     |
| Propusk v universitet / obščezhitie<br>id.card <sub>M</sub> for university <sub>M</sub> / dormitory <sub>N</sub> | byl nedejstvitel'nym / bylo nedejstvitel'nym<br>was invalid <sub>M/N</sub>  |
| Vystrel v vozdux / mišen'<br>shot <sub>M</sub> in air <sub>M</sub> / target <sub>F</sub>                         | byl oglušitel'nym / byla oglušitel'noj<br>was deafening <sub>M/F</sub>      |
| Udar v život / grud'<br>hit <sub>M</sub> in chest <sub>M</sub> / breast <sub>F</sub>                             | byl moščnym / byla moščnoj<br>was powerful <sub>M/F</sub>                   |

Table 1: Experiment 1 stimuli

| Preamble                                                                                                             | Predicate                                                                 |
|----------------------------------------------------------------------------------------------------------------------|---------------------------------------------------------------------------|
| hit <sub>M</sub> in belly <sub>M</sub> / chest <sub>F</sub>                                                          | was strong <sub>M/F</sub>                                                 |
| Perevod na russkij / latyn'<br>translation <sub>M</sub> into Russian <sub>M</sub> / Latin <sub>F</sub>               | byl nepravil'nym / byla nepravil'noj<br>was wrong <sub>M/F</sub>          |
| Spros na metall / med'<br>demand <sub>M</sub> for metal <sub>M</sub> / copper <sub>F</sub>                           | byl značitel'nym / byla značitel'noj<br>was significant <sub>M/F</sub>    |
| Nabaldašnik na posox / trost'<br>knob <sub>M</sub> on staff <sub>M</sub> / walking.stick <sub>F</sub>                | byl uvesistym / byla uvesistoj<br>was heavy <sub>M/F</sub>                |
| Laz pod zabor / izgorod'<br>hole <sub>M</sub> under fence <sub>M</sub> / hedge <sub>F</sub>                          | byl uzkim / byla uzkoj<br>was narrow <sub>M/F</sub>                       |
| Zakaz na tovar / detal'<br>order <sub>M</sub> for product <sub>M</sub> / spare.part <sub>F</sub>                     | byl sročnym / byla sročnoj<br>was urgent <sub>M/F</sub>                   |
| Recept na porošok / maz'<br>prescription <sub>M</sub> for powder <sub>M</sub> / ointment <sub>F</sub>                | byl prosročennym / byla prosročennoj<br>was outdated <sub>M/F</sub>       |
| Material na pidžak / vual'<br>fabric <sub>M</sub> for jacket <sub>M</sub> / veil <sub>F</sub>                        | byl krasivym / byla krasivoj<br>was beautiful <sub>M/F</sub>              |
| Pretendent na tron / dolžnost'<br>contender <sub>M</sub> for throne <sub>M</sub> / position <sub>F</sub>             | byl samouverennym / byla samouverennoj<br>was self-assured <sub>M/F</sub> |
| Vxod v teatr / cerkov'<br>entrance <sub>M</sub> to theater <sub>M</sub> / church <sub>F</sub>                        | byl zakrytym / byla zakrytoj<br>was closed <sub>M/F</sub>                 |
| Nalog na avtomobil' / sobstvennost'<br>tax <sub>M</sub> on car <sub>M</sub> / property <sub>F</sub>                  | byl vysokim / byla vysokoj<br>was high <sub>M/F</sub>                     |
| Ustanovka na effektivnost' / rezul'tat<br>directive <sub>F</sub> at effectiveness <sub>F</sub> / result <sub>M</sub> | byla dejstvennoj / byl dejstvennym<br>was efficient <sub>F/M</sub>        |
| Nakidka na krovat' / divan<br>cover <sub>F</sub> for bed <sub>F</sub> / couch <sub>M</sub>                           | byla raznocvetnoj / byl raznocvetnym<br>was multi-colored <sub>F/M</sub>  |
| Doroga na ploščad' / rynek<br>road <sub>F</sub> to plaza <sub>F</sub> / market <sub>M</sub>                          | byla širokoj / byl širokim<br>was wide <sub>F/M</sub>                     |
| Cena na sol' / saxar<br>price <sub>F</sub> for salt <sub>F</sub> / sugar <sub>M</sub>                                | byla zapredel'noj / byl zapredel'nym<br>was exorbitant <sub>F/M</sub>     |
| Recenzija na povest' / roman<br>review <sub>F</sub> of story <sub>F</sub> / novel <sub>M</sub>                       | byla razgromnoj / byl razgromnym<br>was scathing <sub>F/M</sub>           |

Table 1: Experiment 1 stimuli

| Preamble                                                                                                  | Predicate                                                             |
|-----------------------------------------------------------------------------------------------------------|-----------------------------------------------------------------------|
| Reakcija na novost' / uprek<br>reaction <sub>F</sub> on news <sub>F</sub> / reproach <sub>M</sub>         | byla neadekvatnoj / byl neadekvatnym<br>was inadequate <sub>F/M</sub> |
| Rasplata za podlost' / obman<br>retribution <sub>F</sub> for vileness <sub>F</sub> / lying <sub>M</sub>   | byla skoroj / byl skorym<br>was quick <sub>F/M</sub>                  |
| Nadežda na spravedlivost' / uspeh<br>hope <sub>F</sub> for justice <sub>F</sub> / success <sub>M</sub>    | byla pročnoj / byl pročnym<br>was solid <sub>F/M</sub>                |
| Proverka na pročnost' / intelekt<br>test <sub>F</sub> of stamina <sub>F</sub> / intelligence <sub>M</sub> | byla utomitel'noj / byl utomitel'nym<br>was exhausting <sub>F/M</sub> |
| Bor'ba za vlast' / prestol<br>struggle <sub>F</sub> for power <sub>F</sub> / throne <sub>M</sub>          | byla ožestočennoj / byl ožestočennym<br>was violent <sub>F/M</sub>    |
| Bitva za žizn' / gorod<br>fight <sub>F</sub> for life <sub>F</sub> / town <sub>M</sub>                    | byla žestokoj / byl žestokim<br>was fierce <sub>F/M</sub>             |
| Plata za noč' / vxod<br>price <sub>F</sub> for night <sub>F</sub> / entrance <sub>M</sub>                 | byla nevysokoj / byl nevysokim<br>was low <sub>F/M</sub>              |

## 2 EXPERIMENT 2A

Table 2: Experiment 2a stimuli

| Preamble                                                                                                                | Predicate                                                                | Sent.continuation                                                                           |
|-------------------------------------------------------------------------------------------------------------------------|--------------------------------------------------------------------------|---------------------------------------------------------------------------------------------|
| Vystrel v vozdux / mišen'<br>shot <sub>M</sub> in air <sub>M</sub> / target <sub>F</sub>                                | byl proizveden / byla proizvedena<br>was made <sub>M/F</sub>             | iz tabel'nogo oružija.<br>from assigned weapon.                                             |
| Most čerez ovrag / propast'<br>bridge <sub>M</sub> over ravine <sub>M</sub> / precipice <sub>F</sub>                    | byl sooružen / byla sooružena<br>was built <sub>M/F</sub>                | pered rešajuščim nastupleniem.<br>before the decisive attack.                               |
| Perevod na russkij / latyn'<br>translation <sub>M</sub> into Russian <sub>M</sub> / Latin <sub>F</sub>                  | byl zakončen / byla zakončena<br>was finished <sub>M/F</sub>             | za pjatnadcat' minut.<br>in fifteen minutes                                                 |
| Spros na metall / med'<br>demand <sub>M</sub> for metall <sub>M</sub> / copper <sub>F</sub>                             | byl razogret / byla razogreta<br>was heated up <sub>M/F</sub>            | iz-za nestabil'noj rynočnoj situacii.<br>becuase of unstable situation on the<br>market.    |
| Nabaldašnik na posox / trost'<br>knob <sub>M</sub> on stuff <sub>M</sub> / walking.stick <sub>F</sub>                   | byl vyrezan / byla vyrezana<br>was carved <sub>M/F</sub>                 | v vide golovy pudelja.<br>in the shape of a dog's head.                                     |
| Laz pod zabor / izgorod'<br>hole <sub>M</sub> under fence <sub>M</sub> / hedge <sub>F</sub>                             | byl zadelan / byla zadelana<br>was blocked <sub>M/F</sub>                | s pomošč'ju pary dosok.<br>by a couple of planks.                                           |
| Zakaz na detal' / tovar<br>order <sub>M</sub> for spare.part <sub>F</sub> / goods <sub>M</sub>                          | byl oformlen / byla oformlena<br>was completed <sub>M/F</sub>            | so vsej vozmožnoj pospešnost'ju.<br>as quickly as possible.                                 |
| Recept na maz' / porošok<br>prescription <sub>M</sub> for ointment <sub>F</sub> /<br>powder <sub>M</sub>                | byl vypisan / byla vypisana<br>was issued <sub>M/F</sub>                 | na oficial'nom blanke polikliniki.<br>on the official hospital letterhead.                  |
| Material na vual' / pidžak<br>fabric <sub>M</sub> for veil <sub>F</sub> / jacket <sub>M</sub>                           | byl priobreten / byla priobretena<br>was bought <sub>M/F</sub>           | v central'nom univermage goroda.<br>in the central town store.                              |
| Otbor na dolžnost' / konkurs<br>selection <sub>M</sub> for position <sub>F</sub> /<br>competition <sub>M</sub>          | byl proveden / byla provedena<br>was organized <sub>M/F</sub>            | s narušeniem rossijskogo<br>zakonodatel'stva.<br>with violations of Russian laws.           |
| Vxod v cerkov' / teatr<br>entrance <sub>M</sub> to church <sub>F</sub> / theater <sub>M</sub>                           | byl zakryt / byla zakryta<br>was closed <sub>M/F</sub>                   | iz-za nedavno načavšegosja<br>remonta.<br>because of recently started repairs.              |
| Nalog na sobstvennost' / avtomobil'<br>tax <sub>M</sub> on property <sub>F</sub> / car <sub>M</sub>                     | byl uveličen / byla uveličena<br>was increased <sub>M/F</sub>            | posle martovskogo zasedanija<br>pravitel'stva.<br>after the govnrnment session in<br>March. |
| Ustanovka na effektivnost' / rezul'tat<br>directive <sub>F</sub> at effectiveness <sub>F</sub> /<br>result <sub>M</sub> | byla sformulirovana / byl sformulirovan<br>was formulated <sub>F/M</sub> | v samom načale soveščanija.<br>in the very beginning of the meeting.                        |

Table 2: Experiment 2a stimuli

| Preamble                                                                                                     | Predicate                                                             | Sent.continuation                                                                       |
|--------------------------------------------------------------------------------------------------------------|-----------------------------------------------------------------------|-----------------------------------------------------------------------------------------|
| Nakidka na krovat' / divan<br>cover <sub>F</sub> for bed <sub>F</sub> / couch <sub>M</sub>                   | byla rasšita / byl rasšit<br>was embroidered <sub>F/M</sub>           | v roškošnom vostočnom stile.<br>in splendid oriental style.                             |
| Doroga na ploščad' / rynek<br>road <sub>F</sub> to plaza <sub>F</sub> / market <sub>M</sub>                  | byla razmyta / byl razmyt<br>was eroded <sub>F/M</sub>                | posle nedavnix prolivnyx doždej.<br>after recent heavy rains.                           |
| Cena na sol' / saxar<br>price <sub>F</sub> for salt <sub>F</sub> / sugar <sub>M</sub>                        | byla povyšena / byl povyšen<br>was raised <sub>F/M</sub>              | po pričine istoščenija zapasov.<br>because of the exhaustion of the supplies.           |
| Recenzija na povest' / rasskaz<br>review <sub>F</sub> of story <sub>F</sub> / short.story <sub>M</sub>       | byla napisana / byl napisan<br>was written <sub>F/M</sub>             | dlja izvestnogo literaturnogo<br>žurnala.<br>for a famous literary magazine.            |
| Reakcija na novost' / uprek<br>reaction <sub>F</sub> on news <sub>F</sub> / reproach <sub>M</sub>            | byla predskazuema / byl predskazuem<br>was predictable <sub>F/M</sub> | iz-za carivšego vokrug unynija.<br>since everybody around was feeling down.             |
| Rasplata za obman / podlost'<br>retribution <sub>F</sub> for lying <sub>M</sub> / vileness <sub>F</sub>      | byla bespoščadna / byl bespoščaden<br>was ruthless <sub>F/M</sub>     | iz-za krutogo nrava gercoga.<br>becuase of the bad temper of the duke.                  |
| Nadežda na uspeh / spravedlivost'<br>hope <sub>F</sub> for success <sub>M</sub> / justice <sub>F</sub>       | byla nepokolebima / byl nepokolebim<br>was solid <sub>F/M</sub>       | na protjaženii vsego processa.<br>during the whole trial.                               |
| Žaloba na stress / ustalost'<br>complaint <sub>F</sub> about stress <sub>M</sub> /<br>tiredness <sub>F</sub> | byla vosprinjata / byl vosprinjat<br>was taken <sub>F/M</sub>         | okružajuščimi kak projavlenie<br>slabosti.<br>as a sign of weakness.                    |
| Bor'ba za prestol / vlast'<br>struggle <sub>F</sub> for throne <sub>M</sub> / power <sub>F</sub>             | byla razvjazana / byl razvjazan<br>was unleashed <sub>F/M</sub>       | posle neudačnogo dvorcovogo<br>perevorota.<br>after an unsuccessful coup d'etat.        |
| Blagodarnost' za sovet / pomošč'<br>gratitude <sub>F</sub> for advice <sub>M</sub> / help <sub>F</sub>       | byla proiznesena / byl proiznesen<br>was uttered <sub>F/M</sub>       | s ploxo skryvaemym razdraženiem.<br>with barely hidden irritation.                      |
| Plata za obed / noč'<br>price <sub>F</sub> for dinner <sub>M</sub> / night <sub>F</sub>                      | byla nevelika / byl nevelik<br>was low <sub>F/M</sub>                 | dlja studentov gosudarstvennyx<br>vuzov.<br>for the students of public<br>universities. |
| Stakan pod čaj / moloko<br>cup <sub>M</sub> for tea <sub>M</sub> / milk <sub>N</sub>                         | byl sdelan / bylo sdelano<br>was made <sub>M/N</sub>                  | iz tolstogo matovogo stekla.<br>from a thick opaque glass.                              |
| Vežd v zamok / imenie<br>entrance <sub>M</sub> to castle <sub>M</sub> / estate <sub>N</sub>                  | byl perekryt / bylo perekryto<br>was abandoned <sub>M/N</sub>         | iz-za zatjanuvšixsja dorožnyx rabot.<br>because of long-drawn road work.                |

Table 2: Experiment 2a stimuli

| Preamble                                                                                                             | Predicate                                                        | Sent.continuation                                                                  |
|----------------------------------------------------------------------------------------------------------------------|------------------------------------------------------------------|------------------------------------------------------------------------------------|
| Vzhljad na risunok / izobraženie<br>look <sub>M</sub> at drawing <sub>M</sub> / picture <sub>N</sub>                 | byl brošen / bylo brošeno<br>was made <sub>M/N</sub>             | iz-pod koketlivo opuščennyx resnic.<br>from under the lowered eyelashes.           |
| Otvjet na vopros / vozraženie<br>answer <sub>M</sub> to question <sub>M</sub> / objection <sub>N</sub>               | byl ocenjen / bylo oceneno<br>was appreciated <sub>M/N</sub>     | po dostoinstvu vsemi ekspertami.<br>by all the experts.                            |
| Vid na zaliv / ozero<br>view <sub>M</sub> of gulf <sub>M</sub> / lake <sub>N</sub>                                   | byl isporčen / bylo isporčeno<br>was spoiled <sub>M/N</sub>      | iz-za neokončenoj strojki.<br>because of an unfinished<br>construction.            |
| Pryžok čerez bar'er / prepjactvie<br>jump <sub>M</sub> over barrier <sub>M</sub> / obstacle <sub>N</sub>             | byl vypolnen / bylo vypolneno<br>was performed <sub>M/N</sub>    | bez pomarok vsemi sporcmenami.<br>perfectly by all the sportsmen.                  |
| Udar o derevo / kamen'<br>hit <sub>M</sub> against tree <sub>N</sub> / stone <sub>M</sub>                            | byl neizbežen / bylo neizbežno<br>was inevitable <sub>M/N</sub>  | iz-za sil'nogo zanosa avtomobilija.<br>because of the car skidding.                |
| Test na vnimanie / intellekt<br>test <sub>M</sub> of attention <sub>N</sub> / intelligence <sub>M</sub>              | byl projden / bylo projdeno<br>was completed <sub>M/N</sub>      | bez ser'eznyx ošibok.<br>without serious errors.                                   |
| Bilet na predstavlenie / spektakl'<br>ticket <sub>M</sub> for show <sub>N</sub> / play <sub>M</sub>                  | byl dešev / bylo deševo<br>was cheap <sub>M/N</sub>              | dlja učaščixsja mladšix klassov.<br>for the primary school students.               |
| Bočonok pod vino / portvejn<br>barrel <sub>M</sub> for wine <sub>N</sub> / port <sub>M</sub>                         | byl napolnen / bylo napolneno<br>was full <sub>M/N</sub>         | do kraev prostoj vodoj.<br>to the rim with simple water.                           |
| Talon na obsledovanie / osmotr<br>ticket <sub>M</sub> for examination <sub>N</sub> /<br>examination <sub>M</sub>     | byl izmjat / bylo izmjato<br>was crumpled <sub>M/N</sub>         | iz-za sil'nogo volnenija pacienta.<br>because of the patient's agitation.          |
| Propusk v obščezhitie / universitet<br>id.card <sub>M</sub> for dormitory <sub>N</sub> /<br>iuniversity <sub>M</sub> | byl izgotovlen / bylo izgotovleno<br>was made <sub>M/N</sub>     | iz beloju blesťjaščej plastmassy.<br>from white glossy plastic.                    |
| Okno v pole / dvor<br>window <sub>N</sub> to field <sub>N</sub> / yard <sub>M</sub>                                  | bylo otkryto / byl otkryt<br>was opened <sub>N/M</sub>           | iz-za stojavšej vnutri duxoty.<br>because it was stuffy inside.                    |
| Mesto pod radio / televizor<br>place <sub>N</sub> for radio <sub>N</sub> / TV-set <sub>M</sub>                       | bylo vydeleno / byl vydelen<br>was chosen <sub>N/M</sub>         | na babuškinom komode.<br>on the grand-mother's hest of<br>drawers.                 |
| Vino pod mjaso / syr<br>wine <sub>N</sub> for meat <sub>N</sub> / čees <sub>M</sub>                                  | bylo kupleno / byl kuplen<br>was bought <sub>N/M</sub>           | v malen'kom magazinčike.<br>in a little shop.                                      |
| Upražnenie na čtenie / sčet<br>exercise <sub>N</sub> in reading <sub>N</sub> / counting <sub>M</sub>                 | bylo sostavleno / byl sostavljen<br>was developed <sub>N/M</sub> | s učetom vozrastnyx osobennostej.<br>with age-specific characteristics in<br>mind. |

Table 2: Experiment 2a stimuli

| Preamble                                                                                                            | Predicate                                                         | Sent.continuation                                                                            |
|---------------------------------------------------------------------------------------------------------------------|-------------------------------------------------------------------|----------------------------------------------------------------------------------------------|
| Vremja na zadanie / otdyx<br>time <sub>N</sub> for task <sub>N</sub> / rest <sub>M</sub>                            | bylo ograničeno / byl ograničen<br>was limited <sub>N/M</sub>     | v silu složivšixsja obstoitel'stv.<br>because of the circumstances.                          |
| Razrešenie na stroitel'stvo / remont<br>permit <sub>N</sub> for construction <sub>N</sub> /<br>repairs <sub>M</sub> | bylo podpisano / byl podpisan<br>was signed <sub>N/M</sub>        | posle burnogo obsuždenija proekta.<br>after long discussions of the project.                 |
| Pravo na vybor / sčast'e<br>right <sub>N</sub> for choice <sub>M</sub> / happiness <sub>N</sub>                     | bylo opredeleno / byl opredelen<br>was defined <sub>N/M</sub>     | kak naše neotemlemoe dostojanie.<br>as our inalienable property.                             |
| Pis'mo pro poxod / priklučenie<br>letter <sub>N</sub> about camping <sub>M</sub> /<br>adventure <sub>N</sub>        | bylo otpravleno / byl otpravljen<br>was sent <sub>N/M</sub>       | iz gluxoj sibirskoj derevuški.<br>from a remote village in Syberia.                          |
| Ranenie v život / plečo<br>wound <sub>N</sub> in belly <sub>M</sub> / shoulder <sub>N</sub>                         | bylo polučeno / byl polučen<br>was received <sub>N/M</sub>        | v xode krovoprolitnogo sraženiya.<br>during a slaughterous combat.                           |
| Pogruženie v okean / more<br>dive <sub>N</sub> in ocean <sub>M</sub> / sea <sub>N</sub>                             | bylo otloženo / byl otložen<br>was postponed <sub>N/M</sub>       | iz-za vnezapno razygravšejsja buri.<br>because of a sudden storm.                            |
| Vozdejstvie na razum / soznanie<br>impact <sub>N</sub> on mind <sub>M</sub> /<br>consciousness <sub>N</sub>         | bylo zametno / byl zameten<br>was noticeable <sub>N/M</sub>       | po izmenivšemusja povedeniju<br>ispytuemogo.<br>from the changed behavior of the<br>subject. |
| Zajavlenie na otpusk / uvol'nenie<br>application <sub>N</sub> for vacation <sub>M</sub> /<br>job.quit <sub>N</sub>  | bylo rassmotreno / byl rassmotren<br>was processed <sub>N/M</sub> | v tečenie dvux nedel'.<br>in two weeks.                                                      |



## 3 EXPERIMENT 2B

Table 3: Experiment 2b stimuli

| Preamble                                                                                                       | Predicate                                                         | Sent.continuation                                                                     |
|----------------------------------------------------------------------------------------------------------------|-------------------------------------------------------------------|---------------------------------------------------------------------------------------|
| Povorot v poselok / step'<br>turn <sub>M</sub> to village <sub>M</sub> / steppe <sub>F</sub>                   | byl viden / byla vidna<br>was visible <sub>M/F</sub>              | s veršiny vysokogo xolma.<br>from the top of a hill.                                  |
| Štraf za obman / glupost'<br>fine <sub>M</sub> for fraud <sub>M</sub> / fooling.around <sub>F</sub>            | byl bol'šim / byla bol'šoj<br>was big <sub>M/F</sub>              | iz-za surovosti novogo direktora.<br>because of the harshness of the<br>new director. |
| Fil'm pro podvig / ljubov'<br>movie <sub>M</sub> about feat <sub>M</sub> / love <sub>F</sub>                   | byl snjat / byla snjata<br>was filmed <sub>M/F</sub>              | v sliškom pafosnoj manere.<br>with too much pathos.                                   |
| Boj za aerodrom / krepost'<br>battle <sub>M</sub> for airfield <sub>M</sub> / fortress <sub>F</sub>            | byl perelomnym / byla perelomnoj<br>was critical <sub>M/F</sub>   | dlja xoda graždanskoj vojny.<br>for the course of the civil war.                      |
| Zakaz na tovar / mebel'<br>order <sub>M</sub> for goods <sub>M</sub> / furniture <sub>F</sub>                  | byl vypolnen / byla vypolnena<br>was completed <sub>M/F</sub>     | s sobljudeniem ogovorenyx srokov.<br>in accordance with the deadlines.                |
| Romans pro večer / grust'<br>song <sub>M</sub> about night <sub>M</sub> / sadness <sub>F</sub>                 | byl populjaren / byla populjarna<br>was popular <sub>M/F</sub>    | sredi dam bal'zakovskogo vozrasta.<br>among middle-aged women.                        |
| Traktat pro razum / ličnost'<br>treatise <sub>M</sub> about reason <sub>M</sub> /<br>personality <sub>F</sub>  | byl sostavljen / byla sostavlena<br>was composed <sub>M/F</sub>   | v načale srednix vekov.<br>in the early Middle Ages.                                  |
| Kontejner pod gorox / fasol'<br>jar <sub>M</sub> for peas <sub>M</sub> / beans <sub>F</sub>                    | byl zapolnen / byla zapolnena<br>was filled <sub>M/F</sub>        | počti do samyx kraev.<br>almost to the rim.                                           |
| Otčet pro poxod / neprijatnost'<br>report <sub>M</sub> about camping.trip <sub>M</sub> /<br>issue <sub>F</sub> | byl otpravljen / byla otpravlena<br>was sent <sub>M/F</sub>       | iz dalekoj sibirskoj derevuški.<br>from a remote village in Syberia.                  |
| Vygovor za obman / podlost'<br>reprimand <sub>M</sub> for lying <sub>M</sub> / vileness <sub>F</sub>           | byl surovym / byla surovoj<br>was harsh <sub>M/F</sub>            | daže dlja byvalogo xuligana.<br>even for the tough bully.                             |
| Orden za podvig / smelost'<br>order <sub>M</sub> for feat <sub>M</sub> / courage <sub>F</sub>                  | byl vručen / byla vručena<br>was handed <sub>M/F</sub>            | v xode toržestvennoj ceremonii.<br>at an official ceremony.                           |
| Pryžok na divan / krovat'<br>jump <sub>M</sub> on couch <sub>M</sub> / bed <sub>F</sub>                        | byl rascenen / byla rascenena<br>was considered <sub>M/F</sub>    | kak narušenje pravil priličija.<br>a violation of decorum.                            |
| Trakt čerez poselok / step'<br>road <sub>M</sub> through village <sub>M</sub> / steppe <sub>F</sub>            | byl zabrošen / byla zabrošena<br>was abandoned <sub>M/F</sub>     | v konce prošlogo veka.<br>in the end of the last century.                             |
| Vystrel v stend / mišen'<br>shot <sub>M</sub> at stand <sub>M</sub> / target <sub>F</sub>                      | byl proizveden / byla proizvedena<br>was performed <sub>M/F</sub> | s nevidannoj prežde točnost'ju.<br>with an unheard-of accuracy                        |

Table 3: Experiment 2b stimuli

| Preamble                                                                                                           | Predicate                                                                | Sent.continuation                                                                     |
|--------------------------------------------------------------------------------------------------------------------|--------------------------------------------------------------------------|---------------------------------------------------------------------------------------|
| Put' na vokzal / ploščad'<br>road <sub>M</sub> to train.station <sub>M</sub> / plaza <sub>F</sub>                  | byl utomitel'nym / byla utomitel'noj<br>was exhausting <sub>M/F</sub>    | iz-za nevyinosimo žarkogo solnca.<br>because of extremely hot weather.                |
| Gonorar za perevod / povest'<br>honorarium <sub>M</sub> for translation <sub>M</sub> /<br>short.story <sub>F</sub> | byl vyplačen / byla vyplačena<br>was paid <sub>M/F</sub>                 | posle neskol'kix mesjacev zaderžki.<br>after several months of delay.                 |
| Recept na porošok / lekarstvo<br>prescription <sub>M</sub> for powder <sub>M</sub> / drug <sub>N</sub>             | byl pomjat / bylo pomjato<br>was crumpled <sub>M/N</sub>                 | iz-za častogo predjavlenija<br>aptekarijam.<br>because of being used too often.       |
| Šelk na narjad / plat'e<br>silk <sub>M</sub> for garment <sub>M</sub> / dress <sub>N</sub>                         | byl priobreten / bylo priobreteno<br>was bought <sub>M/N</sub>           | v central'nom univermage goroda.<br>in the city central store.                        |
| Pretendent na prestol / gospodstvo<br>contender <sub>M</sub> for throne <sub>M</sub> / power <sub>N</sub>          | byl ubit / bylo ubito<br>was killed <sub>M/N</sub>                       | v rezul'tate dvorcovogo perevorota.<br>during the coup d'etat.                        |
| Vxod v magazin / zdanie<br>entrance <sub>M</sub> to shop <sub>M</sub> / building <sub>N</sub>                      | byl zakryt / bylo zakryto<br>was closed <sub>M/N</sub>                   | iz-za nedavno načavšegosja<br>remonta.<br>because of the recently started<br>repairs. |
| Rasskaz pro kašel' / zdorov'e<br>story <sub>M</sub> about cough <sub>M</sub> / health <sub>N</sub>                 | byl vyslušan / bylo vyslušano<br>was listened <sub>M/N</sub>             | vračom s bol'sim vnimaniem.<br>by the doctor with great attention.                    |
| Roman pro zagovor / dectvo<br>novel <sub>M</sub> about conspiracy <sub>M</sub> /<br>childhood <sub>N</sub>         | byl opublikovan / bylo opublikovano<br>was published <sub>M/N</sub>      | v nebol'som moskovskom<br>izdatel'stve.<br>in a small publishing house in<br>Moscow.  |
| Šans na uspex / spasenie<br>chance <sub>M</sub> for success <sub>M</sub> / rescue <sub>N</sub>                     | byl upuščen / bylo upuščeno<br>was missed <sub>M/N</sub>                 | v samyj poslednij moment.<br>in the very last moment.                                 |
| Most čerez potok / boloto<br>bridge <sub>M</sub> over torrent <sub>M</sub> / swamp <sub>N</sub>                    | byl nenadežnym / bylo nenadežnym<br>was unstable <sub>M/N</sub>          | posle nedavnix prolivnyx doždej.<br>after recent heavy rains.                         |
| Spusk v tonnel' / uščel'e<br>descent <sub>M</sub> into tunnel <sub>M</sub> / canyon <sub>N</sub>                   | byl osuščestvlen / bylo osuščestvleno<br>was carried.out <sub>M/N</sub>  | so vsemi vozmožnymi<br>predostorožnostjami.<br>with every possible precaution.        |
| Material na zabor / ograždenie<br>material <sub>M</sub> for fence <sub>M</sub> / fence <sub>N</sub>                | byl privezen / bylo privezeno<br>was brought <sub>M/N</sub>              | so sklada ucenennyx tovarov.<br>from the discount materials<br>warehouse.             |
| Otvet na uprek / soobščenie<br>answer <sub>M</sub> to reprimand <sub>M</sub> /<br>message <sub>N</sub>             | byl predskazuemym / bylo predskazuemym<br>was predictable <sub>M/N</sub> | iz-za carivšego vokrug unynija.<br>because everybody around was<br>feeling down.      |

Table 3: Experiment 2b stimuli

| Preamble                                                                                           | Predicate                                                           | Sent.continuation                                                               |
|----------------------------------------------------------------------------------------------------|---------------------------------------------------------------------|---------------------------------------------------------------------------------|
| Otzv na roman / esse<br>review <sub>M</sub> on novel <sub>M</sub> / essay <sub>N</sub>             | byl napisan / bylo napisano<br>was written <sub>M/N</sub>           | dlja izvestnogo literaturnogo žurnala.<br>for a famous literary magazine.       |
| Otpusk na dekabr' / leto<br>job.leave <sub>M</sub> for December <sub>M</sub> / summer <sub>N</sub> | byl zaplanirovan / bylo zaplanirovano<br>was planned <sub>M/N</sub> | do padenija kursa rublja.<br>before the fall of the rouble.                     |
| Spros na benzin / toplivo<br>demand <sub>M</sub> on gas <sub>M</sub> / fuel <sub>N</sub>           | byl povyšěn / bylo povyšěno<br>was increased <sub>M/N</sub>         | po pričine istoščěnija zapasov.<br>because of the exhaustion of the supplies.   |
| Udar v život / plečo<br>hit <sub>M</sub> in belly <sub>M</sub> / shoulder <sub>N</sub>             | byl nanesen / bylo nanesenno<br>was received <sub>M/N</sub>         | v xode zavjazavšejsja draki.<br>during the fight.                               |
| Test na sčēt / čtenie<br>test <sub>M</sub> of counting <sub>M</sub> / reading <sub>N</sub>         | byl sostavlēn / bylo sostavleno<br>was developed <sub>M/N</sub>     | s učetom vozrastnyx osobennostej.<br>with age-specific characteristics in mind. |

## 4 EXPERIMENT 3

Table 4: Experiment 3 stimuli

| Preamble                                                                                                                                          | Predicate                                                                                 | Sent.continuation                                                                   |
|---------------------------------------------------------------------------------------------------------------------------------------------------|-------------------------------------------------------------------------------------------|-------------------------------------------------------------------------------------|
| Vino pod salat / dič' / mjaso<br>wine <sub>N</sub> for salad <sub>M</sub> / fowl <sub>F</sub> / meat <sub>N</sub>                                 | byl kuplen / byla kuplena / bylo kupleno<br>was bought <sub>M/F/N</sub>                   | v magazinčike na okraine.<br>in a little shop in the outskirts.                     |
| Vlijanie na komitet / cerkov' / obščestvo<br>impact <sub>N</sub> on committee <sub>M</sub> / church <sub>F</sub> / society <sub>N</sub>           | byl nezametnym / byla nezametnoj / bylo nezametnym<br>was not.noticeable <sub>M/F/N</sub> | dlja neposvjaščennyx v zagovor.<br>for those who were not part of the conspiracy.   |
| Vozdejstvie na razum / ličnost' / soznanie<br>influence <sub>N</sub> on mind <sub>M</sub> / personality <sub>F</sub> / consciousness <sub>N</sub> | byl zameten / byla zametna / bylo zametno<br>was noticeable <sub>M/F/N</sub>              | po izmenivšemsja povedeniju ispytuemogo.<br>by the changed behavior of the subject. |
| Izvinenie za besporjadok / glupost' / xamstvo<br>apology <sub>N</sub> for clutter <sub>M</sub> / foolishness <sub>F</sub> / rudeness <sub>N</sub> | byl prinesen / byla prinesena / bylo prineseno<br>was given <sub>M/F/N</sub>              | s ploxo skryvaemym razdraženiem.<br>with barely concealed irritation.               |
| Kruževo na narjad / šal' / plat'e<br>lace <sub>N</sub> for garment <sub>M</sub> / shawl <sub>F</sub> / dress <sub>N</sub>                         | byl priobreten / byla priobretena / bylo priobreteno<br>was bought <sub>M/F/N</sub>       | v central'nom univermage goroda.<br>in the central city store.                      |

Table 4: Experiment 3 stimuli

| Preamble                                                                                                                                                      | Predicate                                                                              | Sent.continuation                                                                       |
|---------------------------------------------------------------------------------------------------------------------------------------------------------------|----------------------------------------------------------------------------------------|-----------------------------------------------------------------------------------------|
| Naznačenie na post / dolžnosť /<br>rukovodstvo<br>appointment <sub>N</sub> to office <sub>M</sub> / position <sub>F</sub><br>/ direction <sub>N</sub>         | byl vygodnym / byla vygodnoj / bylo<br>vygodnym<br>was advantageous <sub>M/F/N</sub>   | dlja storonnikov pravjaščej dinastii.<br>for the supporters of the reigning<br>dynasty. |
| Nakazanie za obman / podlost' /<br>xamstvo<br>punishment <sub>N</sub> for deceit <sub>M</sub> /<br>vileness <sub>F</sub> / rudeness <sub>N</sub>              | byl žestokim / byla žestokoj / bylo žestokim<br>was rough <sub>M/F/N</sub>             | daže dlja byvalyx soldat.<br>even for experienced soldiers.                             |
| Napadenie na gorod / krepost' / selo<br>attack <sub>N</sub> on town <sub>M</sub> / forteress <sub>F</sub> /<br>village <sub>N</sub>                           | byl soveršen / byla soveršena / bylo<br>soveršeno<br>was carried.out <sub>M/F/N</sub>  | v gluxoj predrassvetnyj čas.<br>in the early morning.                                   |
| Ozloblenie na kolektiv / vlast' /<br>gosudarstvo<br>exasperation <sub>N</sub> with co-workers <sub>M</sub> /<br>authorities <sub>F</sub> / state <sub>N</sub> | byl vygodnym / byla vygodnoj / bylo<br>vygodnym<br>was advantageous <sub>M/F/N</sub>   | dlja etogo ciničnogo kar'erista.<br>for this cynical careerist.                         |
| Okno v ogorod / step' / pole<br>window <sub>N</sub> to garden <sub>M</sub> / steppe <sub>F</sub> /<br>field <sub>N</sub>                                      | byl otkryt / byla otkryta / bylo otkryto<br>was opened <sub>M/F/N</sub>                | iz-za stojavšej vnutri duxoty.<br>because of the air inside being<br>stuffy.            |
| Opozdanie na samolet / pristan' /<br>sudno<br>being.late <sub>N</sub> to plane <sub>M</sub> / pier <sub>F</sub> /<br>ship <sub>N</sub>                        | byl neizbežen / byla neizbežna / bylo<br>neizbežnym<br>was inevitable <sub>M/F/N</sub> | iz-za remonta kol'cevoj dorogi.<br>because of the repairs of the road.                  |
| Pis'mo pro poxod / neprijatnost' /<br>priključenie<br>letter <sub>N</sub> about camping.trip <sub>M</sub> /<br>issue <sub>F</sub> / adventure <sub>N</sub>    | byl otpravljen / byla otpravlena / bylo<br>otpravleno<br>was sent <sub>M/F/N</sub>     | iz gluxoj sibirskoj derevuški.<br>from a remote village in Syberia.                     |
| Pokryvalo na divan / krovat' / kreslo<br>cover <sub>N</sub> for couch <sub>M</sub> / bed <sub>F</sub> / arm-<br>chair <sub>N</sub>                            | byl rasšit / byla rasšita / bylo rasšito<br>was embroidered <sub>M/F/N</sub>           | v roskošnom vostočnom stile.<br>in splendid oriental style.                             |
| Popadanie v stend / mišen' /<br>jabločko<br>hitting <sub>N</sub> at stand <sub>M</sub> / target <sub>F</sub> /<br>bull's.eye <sub>N</sub>                     | byl vypolnen / byla vypolnena / bylo<br>vypolneno<br>was carried.out <sub>M/F/N</sub>  | s nevidannoju prežde točnosťju.<br>with an unheard-of accuracy.                         |
| Pravo na vybor / pomošč' / sčast'e<br>right <sub>N</sub> for choice <sub>M</sub> / help <sub>F</sub> /<br>happiness <sub>N</sub>                              | byl opredelen / byla opredelena / bylo<br>opredeljeno<br>was defined <sub>M/F/N</sub>  | kak naše neotemlemoe dostojanie.<br>as out inalienable property.                        |

Table 4: Experiment 3 stimuli

| Preamble                                                                                                                                                 | Predicate                                                                                                            | Sent.continuation                                                                   |
|----------------------------------------------------------------------------------------------------------------------------------------------------------|----------------------------------------------------------------------------------------------------------------------|-------------------------------------------------------------------------------------|
| Ranenie v život / grud' / plečo<br>wound <sub>N</sub> in belly <sub>M</sub> / chest <sub>F</sub> /<br>shoulder <sub>N</sub>                              | byl polučen / byla polučena / bylo polučeno<br>was received <sub>M/F/N</sub>                                         | v xode krovoprolitnogo sraženiya.<br>during a slaughterous combat.                  |
| Sraženie za aerodrom / krepost' /<br>ukreplenie<br>battle <sub>N</sub> for airfield <sub>M</sub> / fortress <sub>F</sub> /<br>fortification <sub>N</sub> | byl perelomnym / byla perelomnoj / bylo<br>perelomnym<br>was critical <sub>M/F/N</sub>                               | dlja xoda graždanskoj vojny.<br>for the course of the civil war.                    |
| Upražnenie na sčet / pamjat' / čtenie<br>exercise <sub>N</sub> for counting <sub>M</sub> / memory <sub>F</sub><br>/ reading <sub>N</sub>                 | byl sostavljen / byla sostavlena / bylo<br>sostavleno<br>was developed <sub>M/F/N</sub>                              | s učetom vozrastnyx osobennostej.<br>with age-specific characteristics in<br>mind.  |
| Allergija na porošok / maz' /<br>lekarstvo<br>allergy <sub>F</sub> for powder <sub>M</sub> / drug <sub>F</sub> /<br>ointment <sub>N</sub>                | byl neožidannym / byla neožidannoj / bylo<br>neožidannym<br>was unexpected <sub>M/F/N</sub>                          | dlja neopytnogo lečaščego vrača.<br>for the unexperienced physician.                |
| Banka pod gorox / fasol' / varen'e<br>jar <sub>F</sub> for peas <sub>M</sub> / jam <sub>F</sub> / beans <sub>N</sub>                                     | byl zapolnen / byla zapolnena / bylo<br>zapolneno<br>was filled <sub>M/F/N</sub>                                     | počti do samyx kraev.<br>almost to the rim.                                         |
| Bor'ba za prestol / vlast' /<br>gospodstvo<br>struggle <sub>F</sub> for throne <sub>M</sub> /<br>domination <sub>F</sub> / power <sub>N</sub>            | byl razvjazan / byla razvjazana / bylo<br>razvjazano<br>was unleashed <sub>M/F/N</sub>                               | posle neudačnogo dvorcovogo<br>perevorota<br>after an unsuccessful coup d'etat.     |
| Vera v uspex / ljubov' / dobro<br>faith <sub>F</sub> in success <sub>M</sub> / good <sub>F</sub> / love <sub>N</sub>                                     | byl osnovopolagajuščim / byla<br>osnovopolagajuščej / bylo<br>osnovopolagajuščim<br>was fundamental <sub>M/F/N</sub> | dlja posledovatelej etogo učenija<br>for the followers of this spiritual<br>school. |
| Dver' v magazin / mečet' / zdanie<br>door <sub>F</sub> to shop <sub>M</sub> / building <sub>F</sub> /<br>mosque <sub>N</sub>                             | byl sdelan / byla sdelana / bylo sdelano<br>was made <sub>M/F/N</sub>                                                | iz grubyx počernevšix dosok<br>from rough blackened planks.                         |
| Doroga čerez poselok / step' / pole<br>road <sub>F</sub> through village <sub>M</sub> / field <sub>F</sub> /<br>steppe <sub>N</sub>                      | byl zabrošen / byla zabrošena / bylo<br>zabrošeno<br>was abandoned <sub>M/F/N</sub>                                  | v konce prošlogo veka.<br>in the end of the last century.                           |
| Žaloba na kašel' / migren' / zdorov'e<br>complaint <sub>F</sub> about cough <sub>M</sub> / health <sub>F</sub><br>/ migraine <sub>N</sub>                | byl vosprinjat / byla vosprinjata / bylo<br>vosprinjato<br>was taken <sub>M/F/N</sub>                                | so vsem vozmožnym vnimanijem<br>with all possible attention.                        |

Table 4: Experiment 3 stimuli

| Preamble                                                                                                                                              | Predicate                                                                                          | Sent.continuation                                                                        |
|-------------------------------------------------------------------------------------------------------------------------------------------------------|----------------------------------------------------------------------------------------------------|------------------------------------------------------------------------------------------|
| Kniga pro zagovor / junost' / dectvo<br>book <sub>F</sub> about conspiracy <sub>M</sub> /<br>childhood <sub>F</sub> / youth <sub>N</sub>              | byl opublikovan / byla opublikovana / bylo<br>opublikovano<br>was published <sub>M/F/N</sub>       | v nebol'som moskovskom<br>izdatel'stve.<br>in a small publishing house in<br>Moscow.     |
| Nagrada za podvig / smelost' /<br>kačestvo<br>decoration <sub>F</sub> for feat <sub>M</sub> / quality <sub>F</sub> /<br>courage <sub>N</sub>          | byl vručen / byla vručena / bylo vručeno<br>was handed <sub>M/F/N</sub>                            | v xode toržestvennoj ceremonii<br>at an official ceremony.                               |
| Nadežda na uspeh / pomošč' /<br>spasenie<br>hope <sub>F</sub> for success <sub>M</sub> / rescue <sub>F</sub> /<br>help <sub>N</sub>                   | byl pročnym / byla pročnoj / bylo pročnym<br>was strong <sub>M/F/N</sub>                           | do samogo poslednego momenta.<br>till the very last moment.                              |
| Pereprava čerez potok / propast' /<br>boloto<br>bridge <sub>F</sub> over torrent <sub>M</sub> / swamp <sub>F</sub> /<br>precipice <sub>N</sub>        | byl nenadežnym / byla nenadežnoj / bylo<br>nenadežnym<br>was unstable <sub>M/F/N</sub>             | posle nedavnix prolivnyx doždej<br>after recent heavy rains.                             |
| Pesnja pro večer / grust' / utro<br>song <sub>F</sub> about night <sub>M</sub> / morning <sub>F</sub> /<br>sadness <sub>N</sub>                       | byl populjaren / byla populjarna / bylo<br>populjarno<br>was popular <sub>M/F/N</sub>              | sredi prostogo derevenskogo ljuda.<br>among simple villagers.                            |
| Provoloka na zabor / izgorod' /<br>ograždenie<br>wire <sub>F</sub> for fence <sub>M</sub> / fence <sub>F</sub> / fence <sub>N</sub>                   | byl namotan / byla namotana / bylo<br>namotano<br>was reeled <sub>M/F/N</sub>                      | na bol'suju derevjannuju katušku.<br>on a big wooden bobbine.                            |
| Rasplata za obman / glupost' /<br>p'janstvo<br>retribution <sub>F</sub> for deceit <sub>M</sub> / drinking <sub>F</sub> /<br>foolishness <sub>N</sub> | byl bystryj / byla bystroj / bylo bystryj<br>was quick <sub>M/F/N</sub>                            | iz-za surovosti novogo direktora.<br>because of the rough temper of the<br>new director. |
| Reakcija na uprek / novost' /<br>soobščenie<br>reaction <sub>F</sub> at reproach <sub>M</sub> / message <sub>F</sub><br>/ news <sub>N</sub>           | byl predskazuemym / byla predskazuemoj /<br>bylo predskazuemym<br>was predictable <sub>M/F/N</sub> | iz-za carivšego vokrug unynija<br>since everybody around was feeling<br>down.            |
| Recenzija na roman / povest' / esse<br>review <sub>F</sub> on novel <sub>M</sub> / essay <sub>F</sub> /<br>story <sub>N</sub>                         | byl napisan / byla napisana / bylo napisano<br>was written <sub>M/F/N</sub>                        | dlja izvestnogo literaturnogo<br>žurnala<br>for a famous literary magazine.              |
| Stipendija za dekabr' / osen' / leto<br>stipend <sub>F</sub> for December <sub>M</sub> /<br>summer <sub>F</sub> / autumn <sub>N</sub>                 | byl vyplāčen / byla vyplāčena / bylo<br>vyplāčeno<br>was paid <sub>M/F/N</sub>                     | s počti godovym opozdaniem.<br>with almost a year of delay.                              |

Table 4: Experiment 3 stimuli

| Preamble                                                                                                                 | Predicate                                                                        | Sent.continuation                                                               |
|--------------------------------------------------------------------------------------------------------------------------|----------------------------------------------------------------------------------|---------------------------------------------------------------------------------|
| Cena na benzin / neft' / toplivo<br>price <sub>F</sub> for gas <sub>M</sub> / fuel <sub>F</sub> / petroleum <sub>N</sub> | byl povyš'en / byla povyš'ena / bylo<br>povyš'eno<br>was raised <sub>M/F/N</sub> | po pričine istoščenija zapasov<br>because of the exhaustion of the<br>supplies. |
